# Supplementary material
Source: PubMed Central journal article supplement (PMC8185240)
Supplement: mmc2.pdf [file mmc2.pdf]

# Supplementary Materials for

## SARS-CoV-2 antibody seroprevalence follow-up in Malagasy blood donors during the 2020 COVID-19 Epidemic

Matthieu SCHOENHALS<sup>1\*</sup>, Niry RABENINDRINA<sup>1</sup>, Jean Marius RAKOTONDRAMANGA<sup>1</sup>, Philippe DUSSART<sup>1</sup>, Rindra RANDREMANANA<sup>1</sup>, Jean-Michel HERAUD<sup>1‡</sup>, Soa Fy ANDRIAMANDIMBY<sup>1</sup>, Paquerette Hanitriniala SAHONDRANIRINA<sup>2</sup>, Manuela Christophère ANDRIAMAHATANA VOLOLONIAINA<sup>2</sup>, Dr Fidiniana Mamy RANDRIATSARAFARA<sup>2</sup>, Dr Voahangy RASOLOFO<sup>1</sup>, Zely Arivelo RANDRIAMANANTANY<sup>2†</sup> and André SPIEGEL<sup>1†</sup>

### Affiliations:

<sup>1</sup> Institut Pasteur de Madagascar

<sup>2</sup> Ministry of Public Health of Madagascar

\*Correspondence to: [schoenhals@pasteur.mg](mailto:schoenhals@pasteur.mg)

† ZAR and AS contributed equally

‡ Institut Pasteur de Dakar

### This PDF file includes:

Figs. S1 to S3

Tables S1 to S4

**Fig. S1. Location of the 5 RBTCs for which samples were collected.** Map of Madagascar, showing the location of the 5 RBTCs for which samples were collected, the regions where epidemiological surveillance data was obtained and the populational proportions per region.

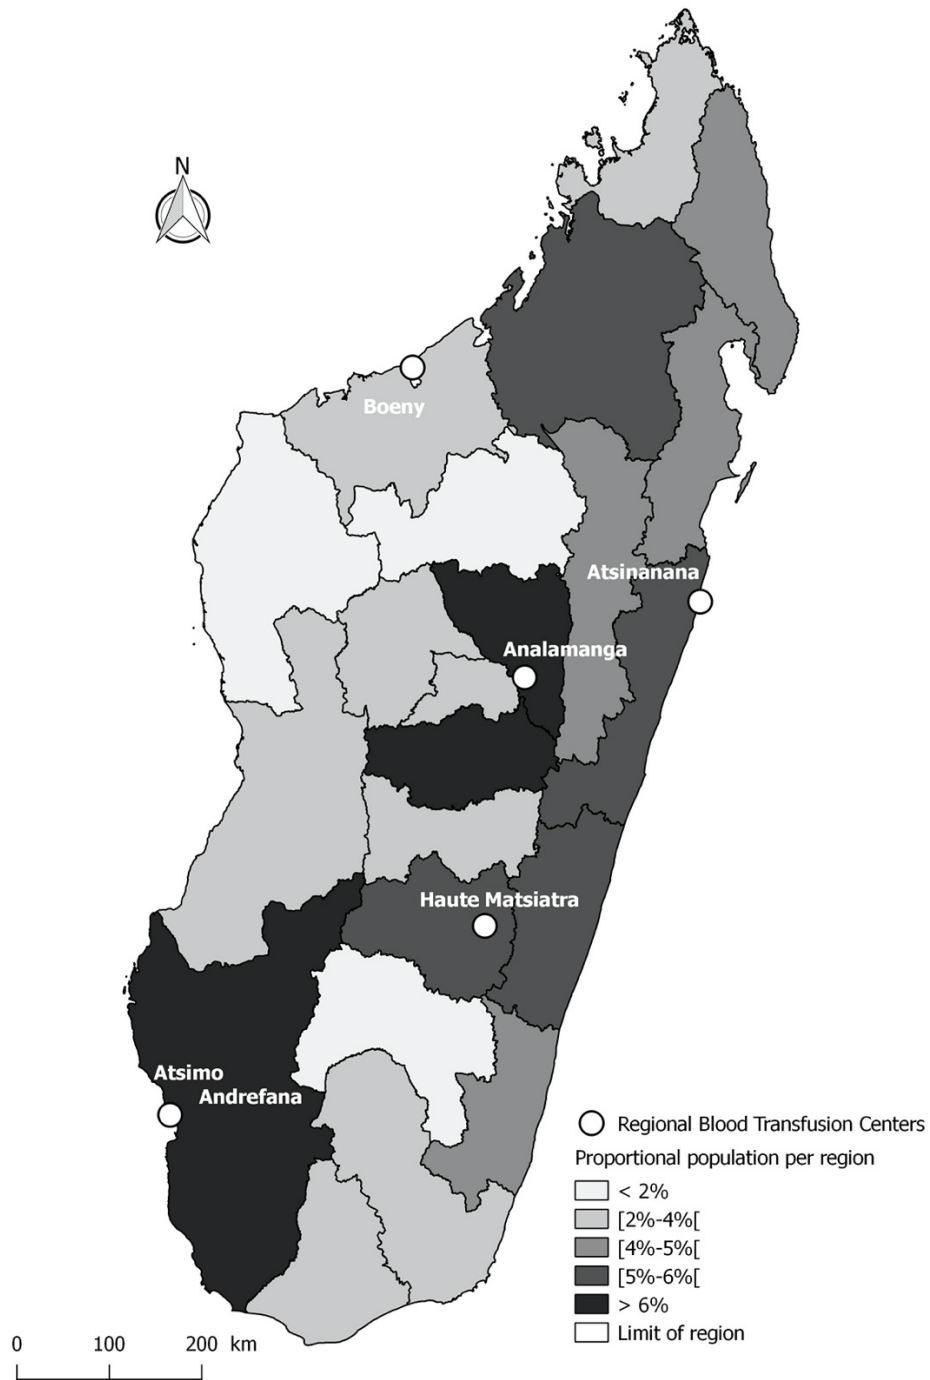

**Fig. S2. Regional population distribution (proportion) by age groups (yrs) and gender in the Malagasy Adult general population and in the RBTCs donors.** a – Atinanana (Toamasina), b – Analamanga (Antananarivo), c – Haute Matsiatra (Fianarantsoa), d – Boeny (Mahajanga), e – Atsimo Andrefana (Toliara). (2018 Malagasy Population and Housing Census<sup>9</sup>)

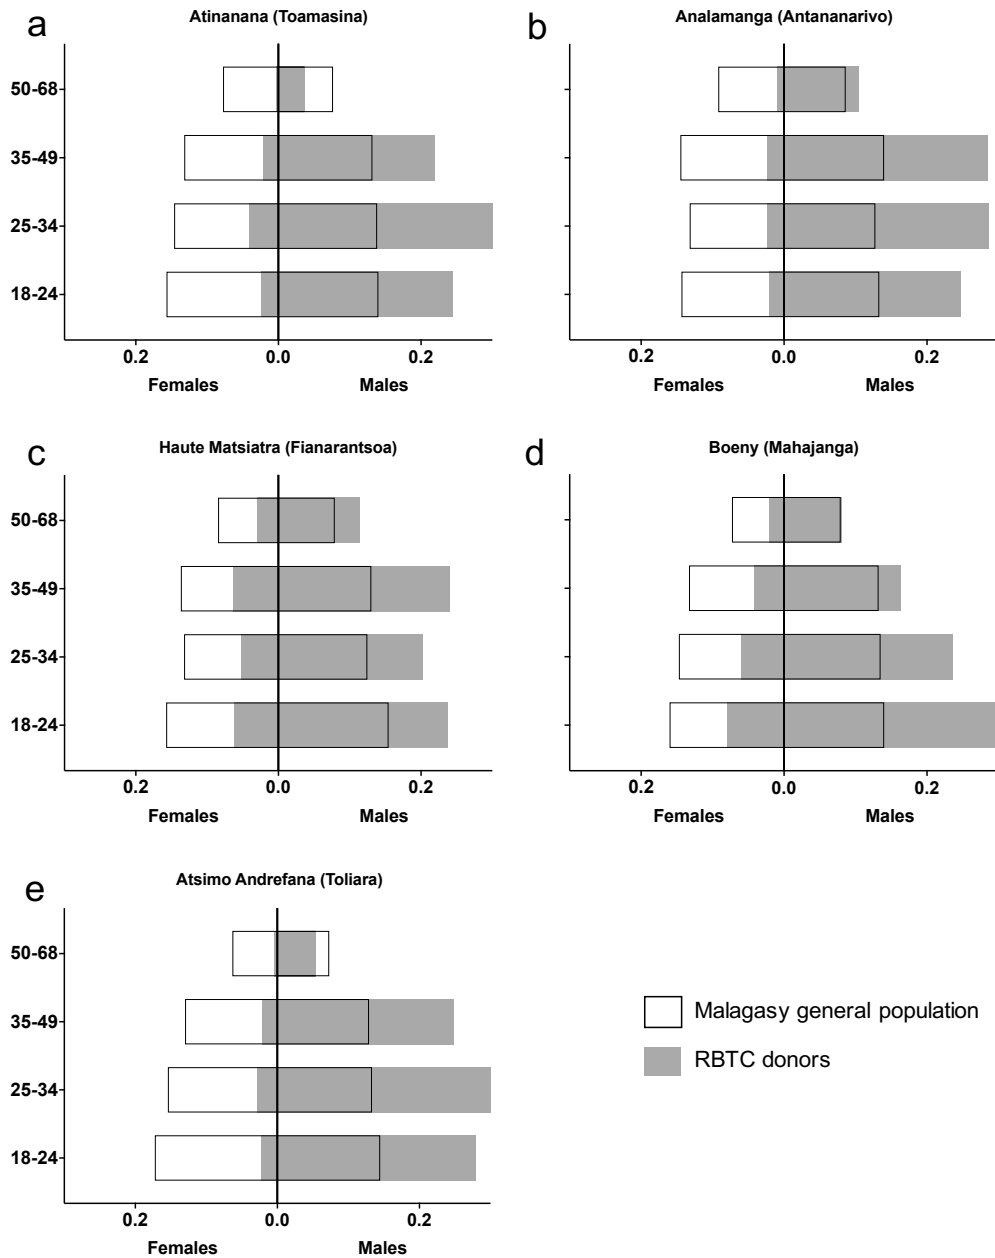

**Fig. S3. Reduction in the level of anti-N SARS-CoV-2 IgG in seropositive donors. (S/P values from donors with  $SP \geq 40\%$ ) from Toamasina from June 2020 to November 2020.**

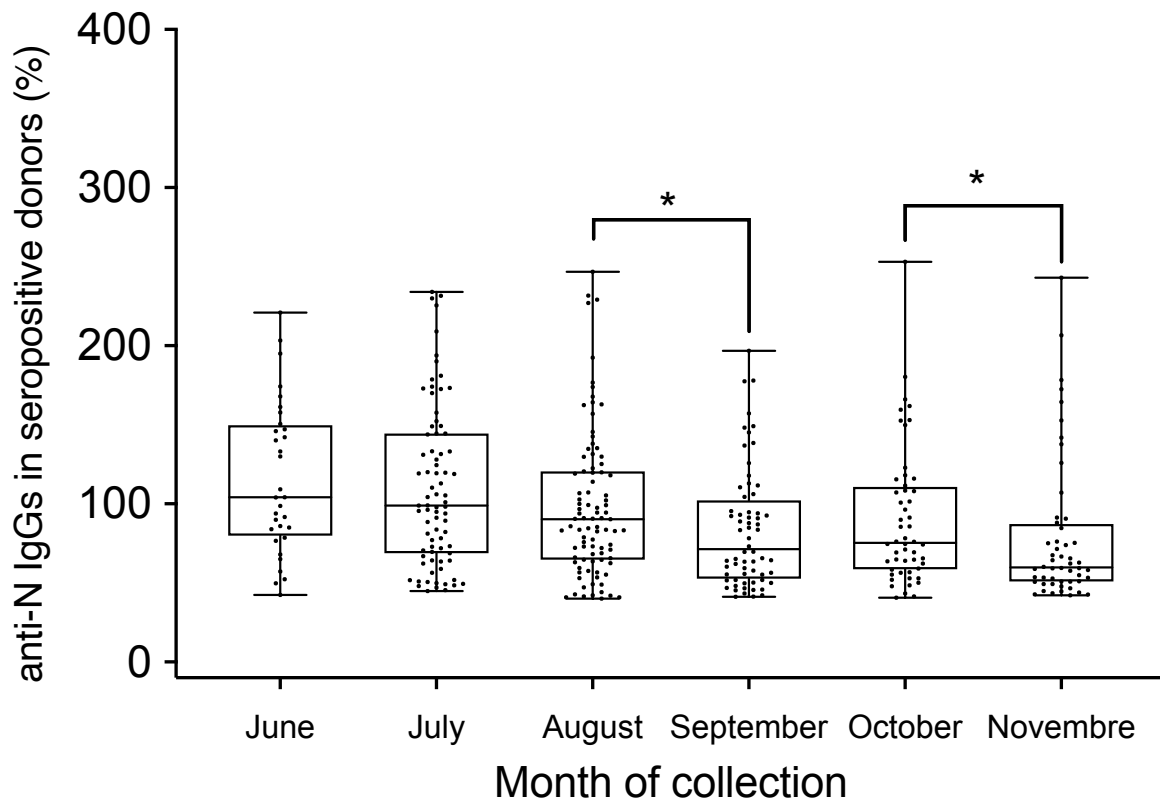

$P < 0.001$  (Kuskal-Wallis nonparametric test).

\*  $P < 0.05$  (Mann-Whitney nonparametric test).

**Table S1:** Monthly surveillance for COVID-19 cases in the regions corresponding to the 5 RBTCs selected for this study in Madagascar, from March to November 2020

| Region<br>(Capital)                       | Month     | Regional COVID-19 Case Confirmation (RT-PCR) |                   |                       |           |
|-------------------------------------------|-----------|----------------------------------------------|-------------------|-----------------------|-----------|
|                                           |           | Total tests                                  | N confirmed cases | RT-PCR positivity (%) | IC 95%    |
| <b>Analamanga<br/>(Antananarivo)</b>      | March     | 584                                          | 29                | 5.0                   | 3.5-7.0   |
|                                           | April     | 1504                                         | 150               | 10.0                  | 8.6-11.6  |
|                                           | May       | 3647                                         | 255               | 7.0                   | 6.2-7.9   |
|                                           | June      | 5658                                         | 887               | 15.7                  | 14.8-16.6 |
|                                           | July      | 17595                                        | 7346              | 41.8                  | 41-42.5   |
|                                           | August    | 22580                                        | 2224              | 9.8                   | 9.5-10.2  |
|                                           | September | 10061                                        | 601               | 6.0                   | 5.5-6.5   |
|                                           | October   | 5684                                         | 147               | 2.6                   | 2.2-3     |
|                                           | November  | 3195                                         | 121               | 3.8                   | 3.2-4.5   |
| <b>Atsinanana<br/>(Toamasina)</b>         | March     | 93                                           | 6                 | 6.5                   | 3.0-13.4  |
|                                           | April     | 240                                          | 31                | 12.9                  | 9.3-17.8  |
|                                           | May       | 2352                                         | 706               | 30.0                  | 28.2-31.9 |
|                                           | June      | 2376                                         | 65                | 2.7                   | 2.2-3.5   |
|                                           | July      | 301                                          | 18                | 6.0                   | 3.8-9.3   |
|                                           | August    | 110                                          | 18                | 16.4                  | 10.6-24.4 |
|                                           | September | 99                                           | 8                 | 8.1                   | 4.2-15.1  |
|                                           | October   | 124                                          | 1                 | 0.8                   | 0.0-4.4   |
|                                           | November  | 96                                           | 9                 | 9.4                   | 5.0-16.9  |
| <b>Haute Matsiatra<br/>(Fianarantsoa)</b> | March     | 14                                           | 1                 | 7.1                   | 0.4-31.5  |
|                                           | April     | 45                                           | 18                | 40.0                  | 27.0-54.5 |
|                                           | May       | 257                                          | 8                 | 3.1                   | 1.6-6.0   |
|                                           | June      | 181                                          | 3                 | 1.7                   | 0.5-4.8   |
|                                           | July      | 18                                           | 16                | 88.9                  | 67.2-98   |
|                                           | August    | 221                                          | 44                | 19.9                  | 15.2-25.7 |
|                                           | September | 148                                          | 46                | 31.1                  | 24.2-38.9 |
|                                           | October   | 5                                            | 0                 | 0.0                   | 0.0-43.4  |
|                                           | November  | 244                                          | 60                | 24.6                  | 19.6-30.4 |
| <b>Boeny<br/>(Mahajanga)</b>              | March     | 30                                           | 1                 | 3.3                   | 0.2-16.7  |
|                                           | April     | 6                                            | 0                 | 0.0                   | 0.0-3.9   |
|                                           | May       | 74                                           | 0                 | 0.0                   | 0.0-4.9   |
|                                           | June      | 72                                           | 3                 | 4.2                   | 1.1-11.5  |
|                                           | July      | 298                                          | 91                | 30.5                  | 25.6-36   |
|                                           | August    | 446                                          | 93                | 20.9                  | 17.3-24.9 |
|                                           | September | 153                                          | 23                | 15.0                  | 10.2-21.5 |
|                                           | October   | 18                                           | 9                 | 50.0                  | 29.0-71.0 |
|                                           | November  | 59                                           | 6                 | 10.2                  | 4.7-20.5  |
| <b>Atsimo Andrefana<br/>(Toliara)</b>     | March     | 12                                           | 0                 | 0.0                   | 0.0-24.2  |
|                                           | April     | 37                                           | 3                 | 8.1                   | 2.8-21.3  |
|                                           | May       | 34                                           | 1                 | 2.9                   | 0.2-14.9  |
|                                           | June      | 53                                           | 1                 | 1.9                   | 0.1-9.9   |
|                                           | July      | 337                                          | 30                | 8.9                   | 6.3-12.4  |
|                                           | August    | 354                                          | 22                | 6.2                   | 4.1-9.2   |
|                                           | September | 102                                          | 25                | 24.5                  | 17.2-33.7 |
|                                           | October   | 116                                          | 0                 | 0.0                   | 0.0-3.2   |
|                                           | November  | 33                                           | 9                 | 27.3                  | 15.1-44.2 |

**Table S2:** Monthly anti-N IgG seroprevalences in blood donors from the 5 RBTCs in Madagascar, from March to November 2020. a – Crude values. b – Population-weighted, test-performance-adjusted direct standardization. c – Population-weighted, test-performance-adjusted Bayesian model.

| Region<br>(Capital)               | Month     | RBTC Blood donor Samples |          | a – crude seroprevalences |             | b – Direct standardization |             | c – Bayesian model |             |
|-----------------------------------|-----------|--------------------------|----------|---------------------------|-------------|----------------------------|-------------|--------------------|-------------|
|                                   |           | Total                    | Positive | %                         | IC95%       | %                          | IC95%       | %                  | IC95%       |
| Analamanga<br>(Antananarivo)      | March     | 496                      | 4        | 0.8                       | 0.3 - 2.1   | 0.1                        | 0.0 - 8.2   | 0.0                | 0.0 - 0.0   |
|                                   | April     | 157                      | 0        | 0.0                       | 0.0 - 2.4   | 0.0                        | 0.0 - 24.8  | 0.0                | 0.0 - 0.0   |
|                                   | May       | 598                      | 1        | 0.2                       | 0.0 - 0.9   | 0.0                        | 0.0 - 7.7   | 0.0                | 0.0 - 0.0   |
|                                   | June      | 308                      | 10       | 3.3                       | 1.8 - 5.9   | 4.3                        | 0.6 - 20.4  | 2.8                | 2.7 - 2.9   |
|                                   | July      | 428                      | 124      | 29.0                      | 24.9 - 33.4 | 30.6                       | 18.5 - 46.4 | 35.4               | 35.2 - 35.6 |
|                                   | August    | 432                      | 152      | 35.2                      | 30.8 - 39.8 | 34.9                       | 22.9 - 50.6 | 41.3               | 41.1 - 41.5 |
|                                   | September | 481                      | 185      | 38.5                      | 34.2 - 42.9 | 35.4                       | 23.3 - 51.4 | 43.5               | 43.3 - 43.8 |
|                                   | October   | 495                      | 178      | 36.0                      | 31.9 - 40.3 | 37.6                       | 24.9 - 52.6 | 43.2               | 43.0 - 43.4 |
|                                   | November  | 502                      | 157      | 31.3                      | 27.4 - 35.5 | 32.5                       | 20.8 - 47.6 | 38.0               | 37.9 - 38.2 |
| Atsinanana<br>(Toamasina)         | March     | –                        | –        | –                         | –           | –                          | –           | –                  | –           |
|                                   | April     | –                        | –        | –                         | –           | –                          | –           | –                  | –           |
|                                   | May       | –                        | –        | –                         | –           | –                          | –           | –                  | –           |
|                                   | June      | 82                       | 32       | 39.0                      | 29.2 - 49.9 | 46.4                       | 10.5 - 72.9 | 43.7               | 43.1 - 44.3 |
|                                   | July      | 182                      | 79       | 43.4                      | 36.4 - 50.7 | 46.9                       | 18.0 - 75.2 | 51.2               | 50.8 - 51.6 |
|                                   | August    | 227                      | 91       | 40.1                      | 33.9 - 46.6 | 45.5                       | 21.7 - 71.2 | 49.2               | 48.9 - 49.5 |
|                                   | September | 213                      | 62       | 29.1                      | 23.4 - 35.5 | 33.9                       | 14.8 - 62.1 | 36.2               | 35.9 - 36.5 |
|                                   | October   | 199                      | 52       | 26.1                      | 20.5 - 32.7 | 33.5                       | 13.7 - 57.6 | 33.0               | 32.6 - 33.3 |
|                                   | November  | 283                      | 52       | 18.4                      | 14.3 - 23.3 | 24.2                       | 9.6 - 48.1  | 23.3               | 23.1 - 23.5 |
| Haute Matsiatra<br>(Fianarantsoa) | March     | –                        | –        | –                         | –           | –                          | –           | –                  | –           |
|                                   | April     | –                        | –        | –                         | –           | –                          | –           | –                  | –           |
|                                   | May       | –                        | –        | –                         | –           | –                          | –           | –                  | –           |
|                                   | June      | 129                      | 1        | 0.8                       | 0.1 - 4.3   | 0.1                        | 0.0 - 25.8  | 0.0                | 0.0 - 0.0   |
|                                   | July      | 142                      | 0        | 0.0                       | 0.0 - 2.6   | 0.0                        | 0.0 - 25.1  | 0.0                | 0.0 - 0.0   |
|                                   | August    | 120                      | 11       | 9.2                       | 5.2 - 15.7  | 6.5                        | 1.6 - 47.4  | 10.4               | 10.2 - 10.6 |
|                                   | September | 173                      | 32       | 18.5                      | 13.4 - 24.9 | 16.1                       | 6.5 - 43.8  | 21.9               | 21.6 - 22.1 |
|                                   | October   | 152                      | 23       | 15.1                      | 10.3 - 21.7 | 17.5                       | 5.5 - 45.5  | 18.7               | 18.5 - 18.9 |
|                                   | November  | 172                      | 22       | 12.8                      | 8.6 - 18.6  | 16.0                       | 5.0 - 40.2  | 16.2               | 16.0 - 16.4 |
| Boeny<br>(Mahajanga)              | March     | –                        | –        | –                         | –           | –                          | –           | –                  | –           |
|                                   | April     | –                        | –        | –                         | –           | –                          | –           | –                  | –           |
|                                   | May       | –                        | –        | –                         | –           | –                          | –           | –                  | –           |
|                                   | June      | 50                       | 0        | 0.0                       | 0.0 - 7.1   | 0.0                        | 0.0 - 56.1  | 0.0                | 0.0 - 0.0   |
|                                   | July      | 98                       | 1        | 1.0                       | 0.2 - 5.6   | 0.9                        | 0.0 - 47.1  | 0.0                | 0.0 - 0.1   |
|                                   | August    | 107                      | 38       | 35.5                      | 27.1 - 44.9 | 50.9                       | 20.0 - 83.2 | 44.5               | 44.1 - 44.8 |
|                                   | September | 53                       | 20       | 37.7                      | 25.9 - 51.2 | 17.8                       | 9.7 - 25.2  | 26.0               | 25.9 - 26.1 |
|                                   | October   | 26                       | 7        | 26.9                      | 13.7 - 46.1 | 28.1                       | 6.7 - 66.9  | 29.6               | 28.9 - 30.2 |
|                                   | November  | 30                       | 5        | 16.7                      | 7.3 - 33.6  | 33.4                       | 3.9 - 76.0  | 21.5               | 20.9 - 22.0 |
| Atsimo Andrefana<br>(Toliara)     | March     | –                        | –        | –                         | –           | –                          | –           | –                  | –           |
|                                   | April     | –                        | –        | –                         | –           | –                          | –           | –                  | –           |
|                                   | May       | –                        | –        | –                         | –           | –                          | –           | –                  | –           |
|                                   | June      | 87                       | 1        | 1.2                       | 0.2 - 6.2   | 0.1                        | 0.0 - 38.3  | 0.0                | 0.0 - 0.1   |
|                                   | July      | 147                      | 1        | 0.7                       | 0.1 - 3.8   | 0.1                        | 0.0 - 42.4  | 0.0                | 0.0 - 0.0   |
|                                   | August    | 167                      | 12       | 7.2                       | 4.2 - 12.1  | 3.8                        | 1.2 - 49.9  | 7.9                | 7.7 - 8.1   |
|                                   | September | 185                      | 38       | 20.5                      | 15.4 - 26.9 | 18.2                       | 7.4 - 54.0  | 24.2               | 23.9 - 24.4 |
|                                   | October   | 139                      | 31       | 22.3                      | 16.2 - 29.9 | 29.2                       | 8.6 - 67.9  | 27.7               | 27.3 - 28.0 |
|                                   | November  | 199                      | 36       | 18.1                      | 13.4 - 24   | 29.5                       | 10.4 - 53.6 | 23.5               | 23.2 - 23.8 |

**Table S3 Blood donor demographics (age. gender) throughout the study.**

|                | Total           | Antananarivo    | Fianarantsoa    | Mahajanga       | Toamasina       | Toliara         |
|----------------|-----------------|-----------------|-----------------|-----------------|-----------------|-----------------|
| <i>Samples</i> |                 |                 |                 |                 |                 |                 |
| N              | 7259            | 3897            | 888             | 364             | 1186            | 924             |
| p(%) of total  | 100             | 53.7            | 12.2            | 5               | 16.3            | 12.7            |
| <i>Age</i>     |                 |                 |                 |                 |                 |                 |
| Median (Q1-Q2) | 30(24-40)       | 31(24-42)       | 31(23-43)       | 27(22-39)       | 29(24-36)       | 29(23-38)       |
| IQR            | 16              | 18              | 20              | 17              | 12              | 15              |
| Mean (IC95%)   | 32.8(32.5-33)   | 33.7(33.4-34.1) | 33.6(32.8-34.4) | 31.6(30.4-32.7) | 30.7(30.2-31.2) | 31.3(30.6-31.9) |
| SD             | 10.8            | 11.2            | 11.9            | 10.8            | 8.7             | 9.9             |
| <i>Gender</i>  |                 |                 |                 |                 |                 |                 |
| Male (IC95%)   | 80.2(79.3-81.1) | 74.9(73.5-76.2) | 78.7(75.9-81.3) | 78.3(73.8-82.2) | 90.1(88.2-91.6) | 92.2(90.3-93.8) |
| Female (IC95%) | 19.8(18.9-20.7) | 25.1(23.8-26.5) | 21.3(18.7-24.1) | 21.7(17.8-26.2) | 9.9(8.4-11.8)   | 7.8(6.2-9.7)    |

**Table S4** Bivariate seropositivity analysis according to the demographic characteristics of the population and the month of sample collection in the 5 RBTCs from March to November 2020

|              | Samples (N)   | proportion (%) | Seropositives (n) | seroprevalence (%) | p-values |      |
|--------------|---------------|----------------|-------------------|--------------------|----------|------|
| Antananarivo | <i>Gender</i> |                |                   |                    | 0.298    |      |
|              | Male          | 2917           | 74.9              | 619                |          | 21.2 |
|              | Female        | 980            | 25.1              | 192                | 19.6     |      |
|              | <i>Age</i>    |                |                   |                    | 0.189    |      |
|              | 18-24         | 1062           | 27.3              | 205                |          | 19.3 |
|              | 25-34         | 1201           | 30.8              | 239                |          | 19.9 |
|              | 35-49         | 1204           | 30.9              | 270                |          | 22.4 |
|              | 50-68         | 430            | 11                | 97                 | 22.6     |      |
|              | <i>Months</i> |                |                   |                    | 0.001    |      |
|              | Mar           | 428            | 11                | 124                |          | 29   |
|              | Apr           | 496            | 12.7              | 4                  |          | 0.8  |
|              | May           | 432            | 11.1              | 152                |          | 35.2 |
|              | Jun           | 308            | 7.9               | 10                 |          | 3.2  |
|              | Jul           | 598            | 15.3              | 1                  |          | 0.2  |
| Aug          | 157           | 4              | 0                 | 0                  |          |      |
| Sept         | 502           | 12.9           | 157               | 31.3               |          |      |
| Oct          | 495           | 12.7           | 178               | 36                 |          |      |
| Nov          | 481           | 12.3           | 185               | 38.5               |          |      |
| Toamasina    | <i>Gender</i> |                |                   |                    | 0.815    |      |
|              | Male          | 1068           | 90.1              | 333                |          | 31.2 |
|              | Female        | 118            | 9.9               | 35                 | 29.7     |      |
|              | <i>Age</i>    |                |                   |                    | 0.199    |      |
|              | 18-24         | 332            | 28                | 117                |          | 35.2 |
|              | 25-34         | 524            | 44.2              | 159                |          | 30.3 |
|              | 35-49         | 285            | 24                | 78                 |          | 27.4 |
|              | 50-68         | 45             | 3.8               | 14                 | 31.1     |      |
|              | <i>Months</i> |                |                   |                    | 0        |      |
|              | Jun           | 227            | 19.1              | 91                 |          | 40.1 |
|              | Jul           | 182            | 15.3              | 79                 |          | 43.4 |
|              | Aug           | 82             | 6.9               | 32                 |          | 39   |
|              | Sept          | 283            | 23.9              | 52                 |          | 18.4 |
|              | Oct           | 199            | 16.8              | 52                 |          | 26.1 |
| Nov          | 213           | 18             | 62                | 29.1               |          |      |
| Fianarantsoa | <i>Gender</i> |                |                   |                    | 0.904    |      |
|              | Male          | 699            | 78.7              | 71                 |          | 10.2 |
|              | Female        | 189            | 21.3              | 18                 | 9.5      |      |
|              | <i>Age</i>    |                |                   |                    | 0.707    |      |
| 18-24        | 290           | 32.7           | 26                | 9                  |          |      |



|           |               |     |      |     |      |       |
|-----------|---------------|-----|------|-----|------|-------|
|           | 25-34         | 227 | 25.6 | 21  | 9.3  |       |
|           | 35-49         | 249 | 28   | 27  | 10.8 |       |
|           | 50-68         | 122 | 13.7 | 15  | 12.3 |       |
|           | <i>Months</i> |     |      |     |      | 0.001 |
|           | Jun           | 120 | 13.5 | 11  | 9.2  |       |
|           | Jul           | 142 | 16   | 0   | 0    |       |
|           | Aug           | 129 | 14.5 | 1   | 0.8  |       |
|           | Sept          | 172 | 19.4 | 22  | 12.8 |       |
|           | Oct           | 152 | 17.1 | 23  | 15.1 |       |
|           | Nov           | 173 | 19.5 | 32  | 18.5 |       |
|           | <i>Gender</i> |     |      |     |      | 0.023 |
|           | Male          | 285 | 78.3 | 48  | 16.8 |       |
|           | Female        | 79  | 21.7 | 23  | 29.1 |       |
|           | <i>Age</i>    |     |      |     |      | 0.02  |
|           | 18-24         | 139 | 38.2 | 36  | 25.9 |       |
|           | 25-34         | 108 | 29.7 | 13  | 12   |       |
|           | 35-49         | 80  | 22   | 12  | 15   |       |
| Mahajanga | 50-68         | 37  | 10.2 | 10  | 27   |       |
|           | <i>Months</i> |     |      |     |      | 0.001 |
|           | Jun           | 107 | 29.4 | 38  | 35.5 |       |
|           | Jul           | 98  | 26.9 | 1   | 1    |       |
|           | Aug           | 50  | 13.7 | 0   | 0    |       |
|           | Sept          | 30  | 8.2  | 5   | 16.7 |       |
|           | Oct           | 26  | 7.1  | 7   | 26.9 |       |
|           | Nov           | 53  | 14.6 | 20  | 37.7 |       |
|           | <i>Gender</i> |     |      |     |      | 0.653 |
|           | Male          | 852 | 92.2 | 108 | 12.7 |       |
|           | Female        | 72  | 7.8  | 11  | 15.3 |       |
|           | <i>Age</i>    |     |      |     |      | 0.939 |
|           | 18-24         | 282 | 30.5 | 39  | 13.8 |       |
|           | 25-34         | 330 | 35.7 | 41  | 12.4 |       |
|           | 35-49         | 259 | 28   | 33  | 12.7 |       |
| Toliara   | 50-68         | 53  | 5.7  | 6   | 11.3 |       |
|           | <i>Months</i> |     |      |     |      | 0.001 |
|           | Jun           | 167 | 18.1 | 12  | 7.2  |       |
|           | Jul           | 147 | 15.9 | 1   | 0.7  |       |
|           | Aug           | 87  | 9.4  | 1   | 1.1  |       |
|           | Sept          | 199 | 21.5 | 36  | 18.1 |       |
|           | Oct           | 139 | 15   | 31  | 22.3 |       |
|           | Nov           | 185 | 20   | 38  | 20.5 |       |

\*: Chi<sup>2</sup> test or Fisher's exact test were used.
